# Supplementary material for: Nuclear polyglutamine-containing protein aggregates as active proteolytic centers
Source: PubMed Central journal article supplement — J Cell Biol. 2008 Feb 25;180(4):697–704. doi: 10.1083/jcb.200708131 (PMC2265588; doi:10.1083/jcb.200708131), 2008-02-25
Supplement: supp_jcb.200708131_3.pdf [file supp_jcb.200708131_3.pdf]

Table S1. **Protein composition and biochemical properties of polyQ- versus silica-NP-induced NIs**

|                                | <b>Expanded PolyQ-induced NIs</b> | <b>Silica-NP-induced ubiquitin NIs</b> | <b>Silica-NP-induced topo I NIs</b> |
|--------------------------------|-----------------------------------|----------------------------------------|-------------------------------------|
| PolyQ                          | + <sup>a,b</sup>                  | +                                      | + <sup>c</sup>                      |
| TBP                            | + <sup>a,d,e</sup>                | +                                      | + <sup>c</sup>                      |
| CBP                            | + <sup>f,g</sup>                  | +                                      | + <sup>c</sup>                      |
| Huntingtin                     | + <sup>d,e,h,i,j,k</sup>          | +                                      | + <sup>c</sup>                      |
| Ataxin-1                       | + <sup>g,l</sup>                  | ND                                     | ND                                  |
| Ataxin-3                       | + <sup>m,n</sup>                  | ND                                     | +                                   |
| Ubiquitin                      | + <sup>a,e,g,h,i,j,l,n</sup>      | +                                      | + <sup>c</sup>                      |
| 20S proteasomes                | + <sup>g,h,i,j,m,o</sup>          | +                                      | + <sup>c</sup>                      |
| UbcH6                          | ND                                | +                                      | + <sup>c</sup>                      |
| MDM2                           | + <sup>e,p</sup>                  | +                                      | + <sup>c</sup>                      |
| Topo I                         | ND                                | +                                      | + <sup>c</sup>                      |
| PML                            | + <sup>b,p,q</sup>                | +                                      | + <sup>c</sup>                      |
| p80 coilin                     | + <sup>q</sup>                    | +                                      | + <sup>c</sup>                      |
| Fibrillarin                    | ND                                | +                                      | + <sup>c</sup>                      |
| PCNA                           | ND                                | —                                      | — <sup>c</sup>                      |
| Filter retardation assay       | + <sup>r</sup>                    | +                                      | +                                   |
| Congo red sensitive            | + <sup>s</sup>                    | +                                      | +                                   |
| Trehalose sensitive            | + <sup>t</sup>                    | +                                      | + <sup>c</sup>                      |
| Proteasome inhibitor sensitive | + <sup>u</sup>                    | +                                      | +                                   |
| UPS, PML coat                  | + <sup>q</sup>                    | +                                      | +                                   |

MDM2, murine double minute 2; PCNA, proliferating cell nuclear antigen; TBP, TATA binding protein.

<sup>a</sup>Nakamura, K., S.Y. Jeong, T. Uchihara, M. Anno, K. Nagashima, T. Nagashima, S. Ikeda, S. Tsuji, and I. Kanazawa. 2001. *Hum. Mol. Genet.* 10:1441–1448.

<sup>b</sup>Janer, A., E. Martin, M.P. Muriel, M. Latouche, H. Fujigasaki, M. Ruberg, A. Brice, Y. Trotter, and A. Sittler. 2006. *J. Cell Biol.* 174:65–76.

<sup>c</sup>Chen, M., and A. von Mikecz. 2005. *Exp. Cell Res.* 305:51–62.

<sup>d</sup>Huang, C.C., P.W. Faber, F. Persichetti, V. Mittal, J.P. Vonsattel, M.E. MacDonald, and J.F. Gusella. 1998. *Somat. Cell Mol. Genet.* 24:217–233.

<sup>e</sup>Suhr, S.T., M.C. Senut, J.P. Whitelegge, K.F. Faull, D.B. Cuizon, and F.H. Gage. 2001. *J. Cell Biol.* 153:283–294.

<sup>f</sup>Kazantsev, A., E. Preisinger, A. Dranovsky, D. Goldgaber, and D. Housman. 1999. *Proc. Natl. Acad. Sci. USA.* 96:11404–11409.

<sup>g</sup>Stenoien, D.L., M. Mielke, and M.A. Mancini. 2002. *Nat. Cell Biol.* 4:806–810.

<sup>h</sup>Jana, N.R., E.A. Zemskov, Gh Wang, and N. Nukina. 2001. *Hum. Mol. Genet.* 10:1049–1059.

<sup>i</sup>Waelter, S., A. Boeddrich, R. Lurz, E. Scerzinger, G. Lueder, H. Lehrach, and E.E. Wanker. 2001. *Mol. Biol. Cell.* 12:1393–1407.

<sup>j</sup>Hazeki, N., T. Tsukamoto, I. Yazawa, M. Koyama, S. Hattori, I. Someki, T. Iwatsubo, K. Nakamura, J. Goto, and I. Kanazawa. 2002. *Biochem. Biophys. Res. Com.* 294:429–440.

<sup>k</sup>Kim, S., E.A. Nollen, K. Kitagawa, V.P. Bindokas, and R.I. Morimoto. 2002. *Nature Cell Biol.* 4:826–831.

<sup>l</sup>Cummings, C.J., M.A. Mancini, B. Antalffy, D.B. DeFranco, H.T. Orr, and H.Y. Zoghbi. 1998. *Nat. Genet.* 19:148–154.

<sup>m</sup>Verhoef, L.G., K. Lindsten, M.G. Masucci, and N.P. Dantuma. 2002. *Hum. Mol. Genet.* 11:2689–2700.

<sup>n</sup>Bichelmeier, U., T. Schmidt, J. Hübener, J. Boy, K. Häbig, S. Poths, M. Bonin, M. Knipper, W.J. Schmidt, J. Wilbertz, et al. 2007. *J. Neurosci.* 27:7418–7428.

<sup>o</sup>Nollen, E.A., S.M. Garcia, G. van Haften, S. Kim, A. Chavez, R.I. Morimoto, and R.H. Plasterk. 2004. *Proc. Natl. Acad. Sci. USA.* 101:6403–6408.

<sup>p</sup>Goehler, H., M. Lalowski, U. Stelzl, S. Waelter, M. Stroedicke, U. Worm, A. Droege, K.S. Lindenberg, M. Knoblich, C. Haenig, et al. 2004. *Mol. Cell* 15:853–865.

<sup>q</sup>Yamada, M., T. Sato, T. Shimohata, S. Hayashi, S. Igarashi, S. Tsuji, and H. Takahashi. 2001. *Am. J. Pathol.* 159:1785–1795.

<sup>r</sup>Sittler, A., S. Wälter, N. Wedemeyer, R. Hasenbank, E. Scherzinger, H. Eickhoff, G.P. Bates, H. Lehrach, and E.E. Wanker. 1998. *Mol. Cell* 2:427–436.

<sup>s</sup>Cooper, J.H. 1969. *J. Clin. Path.* 22:410–413.

<sup>t</sup>Tanaka, M., Y. Machida, S. Niu, T. Ikeda, N.R. Jana, H. Doi, M. Kurosawa, M. Nekooki, and N. Nukina. 2004. *Nat. Med.* 10:148–154.

<sup>u</sup>Ding, Q., J.J. Lewis, K.M. Strum, E. Dimayuga, A.J. Bruce-Keller, J.C. Dunn, and J. N. Keller. 2002. *J. Biol. Chem.* 277:13935–13942.
